# Supplementary material for: Impact of tight glucose control on circulating 3-hydroxybutyrate in critically ill patients
Source: Springer Nature journal article supplement (doi:10.1186/s13054-021-03772-6), 2021-10-25
Supplement: MOESM1 [file 19791982]

---

**Impact of tight glucose control  
on circulating 3-hydroxybutyrate in critically ill patients**

**Additional file 1**

---

Jan Gunst\*, Astrid De Bruyn\*, Michael P. Casaer,  
Sarah Vander Perre, Lies Langouche, Greet Van den Berghe

\* Equal contribution

Clinical Division and Laboratory of Intensive Care Medicine, Department of Cellular and  
Molecular Medicine, KU Leuven, Leuven, Belgium

**Table S1. Baseline characteristics and outcome of matched adults**

| BASELINE CHARACTERISTICS                 | SURGICAL ICU      |                  |         | MEDICAL ICU       |                  |         |
|------------------------------------------|-------------------|------------------|---------|-------------------|------------------|---------|
|                                          | LIBERAL GC (N=30) | TIGHT GC (N=30)  | P-VALUE | LIBERAL GC (N=20) | TIGHT GC (N=20)  | P-VALUE |
| Age (years) - median (IQR)               | 64 (55-74)        | 65 (50-71)       | 1.00    | 66 (56-75)        | 68 (59-77)       | 0.66    |
| Length (cm) – median (IQR)               | 170 (165-175)     | 174 (170-180)    | 0.11    | 170 (166-179)     | 170 (166-175)    | 0.80    |
| BMI (kg/m <sup>2</sup> ) – median (IQR)  | 25.2 (22.9-29.3)  | 26.2 (21.8-28.1) | 0.87    | 22.3 (19.6-25.7)  | 24.5 (22.5-25.9) | 0.14    |
| Sex (male) - no. (%)                     | 26 (87)           | 28 (93)          | 0.67    | 15 (75)           | 17 (85)          | 0.69    |
| Diagnostic group – no. (%)               |                   |                  | 1.00    |                   |                  | 1.00    |
| Surgical                                 |                   |                  |         |                   |                  |         |
| Transplantation – no. (%)                | 4 (13)            | 2 (7)            |         |                   |                  |         |
| Cardiac surgery – no. (%)                | 17 (57)           | 19 (63)          |         |                   |                  |         |
| Other surgery– no. (%)                   | 9 (30)            | 9 (30)           |         |                   |                  |         |
| Medical – no. (%)                        |                   |                  |         | 20 (100)          | 20 (100)         |         |
| History of malignancy – no. (%)          | 1 (3)             | 1 (3)            | 1.00    | 5 (25)            | 5 (25)           | 1.00    |
| APACHE-II score – median (IQR)           | 8 (7-12)          | 9 (6-11)         | 0.76    | 21 (16-31)        | 23 (18-26)       | 0.98    |
| <b>OUTCOME</b>                           |                   |                  |         |                   |                  |         |
| ICU mortality – no. (%)                  | 5 (17)            | 1 (3)            | 0.19    | 11 (55)           | 4 (20)           | 0.05    |
| Length of ICU stay (days) – median (IQR) | 4 (3-15)          | 4 (4-13)         | 0.94    | 10 (6-23)         | 7 (5-15)         | 0.09    |

BMI=body mass index. APACHE-II score=Acute Physiology and Chronic Health Evaluation II
